# Supplementary material for: SnO2/h-BN nanocomposite modified separator as a high-efficiency polysulfide trap in lithium–sulfur batteries
Source: Royal Society of Chemistry journal article supplement (doi:10.1039/d3ya00260h), 2023-01-01
Supplement: d3ya00260h1.pdf [file d3ya00260h1.pdf]

## **Supporting Information:**

### **SnO<sub>2</sub>/h-BN Nanocomposite Modified Separator as High-Efficiency Polysulfide Trap in Lithium-Sulfur Battery**

Bongu Chandra Sekhar <sup>1</sup>, Yasmin Mussa <sup>1</sup>, Sara Aleid <sup>1</sup>, Muhammad Arsalan<sup>2</sup>, and Edreese H. Alsharaeh\* <sup>1</sup>

<sup>1</sup> College of Science and General Studies, AlFaisal University, PO Box 50927, Riyadh, 11533, Saudi Arabia

<sup>2</sup>EXPEC Advanced Research Center, Saudi Aramco, P.O. Box 5000, Dhahran, 31311, Saudi Arabia

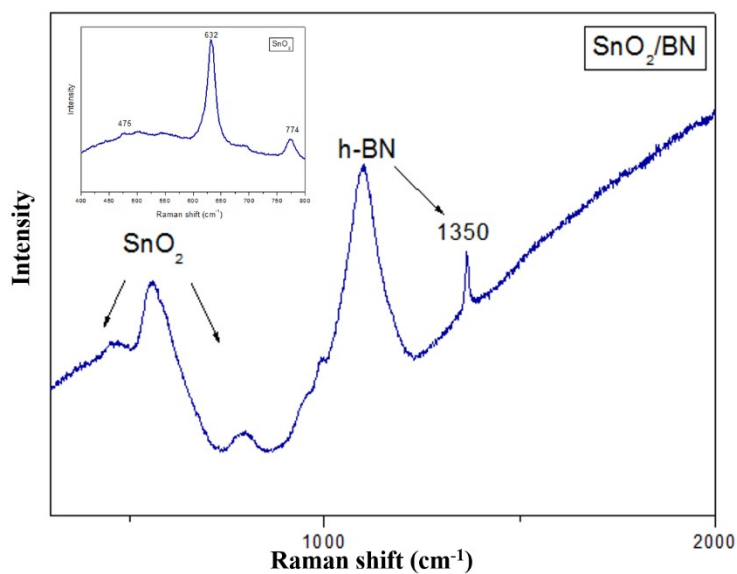

**Figure S1.** Raman spectra of the SnO<sub>2</sub>/10% h-BN composite.

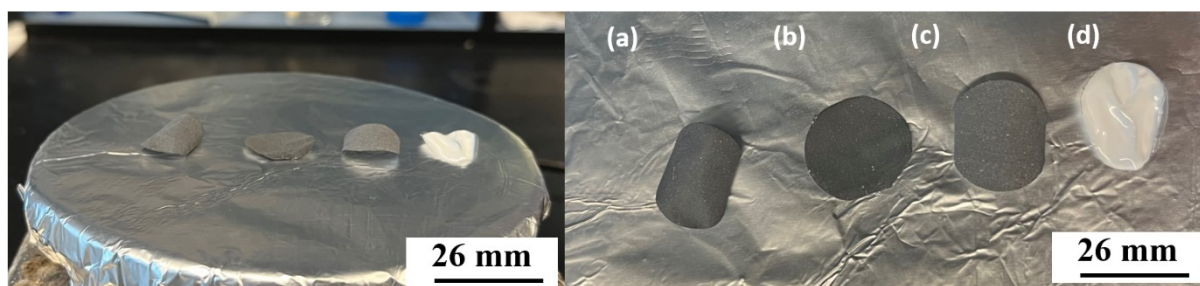

**Figure S2.** Thermal stability behavior of (a) SnO<sub>2</sub>/5% h-BN composite coated separator, (b) SnO<sub>2</sub>/10% h-BN composite coated separator, (c) SnO<sub>2</sub>/25% h-BN composite coated separator and (d) pristine polypropylene from room temperature to 100 °C.

**Table S1.** Thermal shrinkage of the separators.

| S. No | Separator Name             | Shrinking (%) |
|-------|----------------------------|---------------|
| 1.    | Polypropylene              | 47            |
| 2.    | SnO <sub>2</sub> /5% h-BN  | 31            |
| 3.    | SnO <sub>2</sub> /10% h-BN | 4.7           |
| 4.    | SnO <sub>2</sub> /25% h-BN | 6.3           |

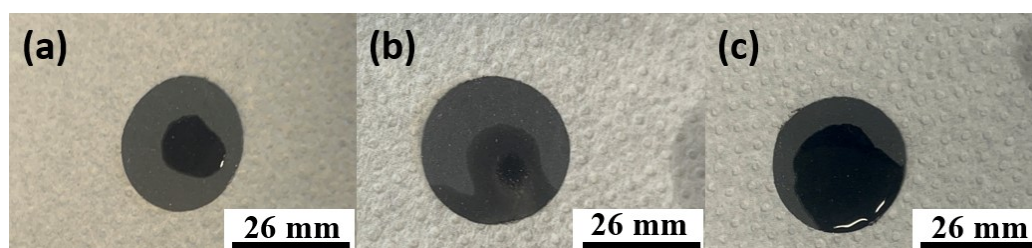

**Figure S3.** Electrolyte wettability study of (a) SnO<sub>2</sub>/5% h-BN composite coated separator, SnO<sub>2</sub>/10% h-BN composite coated separator, and (c) SnO<sub>2</sub>/25% h-BN composite coated separator.

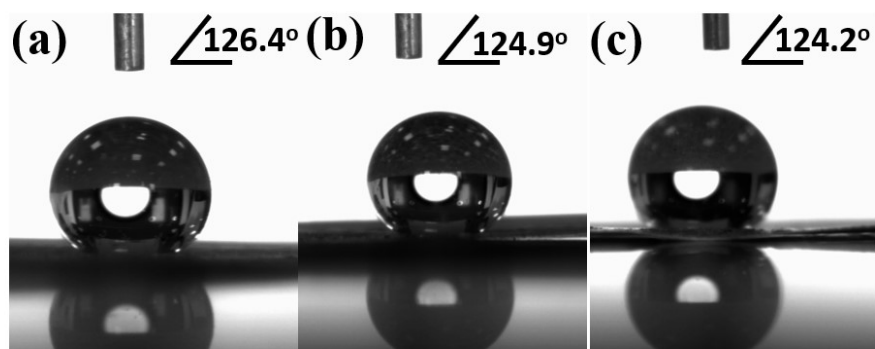

**Figure S4.** Contact angle study of the (a) SnO<sub>2</sub>/5% h-BN composite coated separator, SnO<sub>2</sub>/10% h-BN composite coated separator, and (c) SnO<sub>2</sub>/25% h-BN composite coated separator.

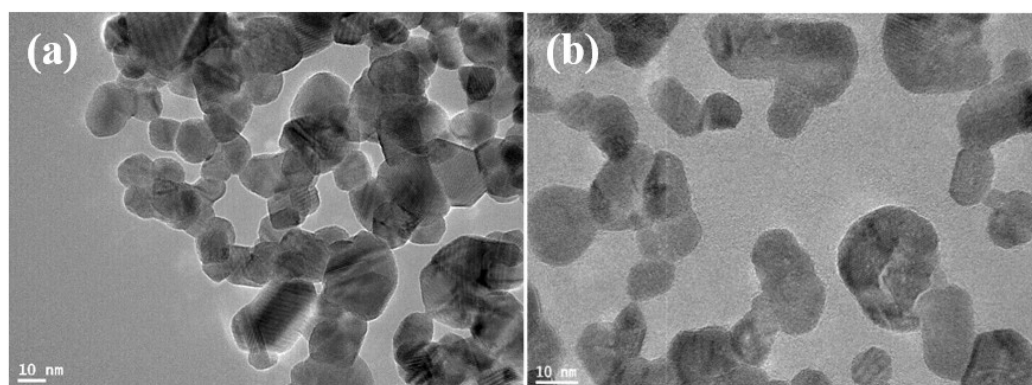

**Figure S5.** TEM images of (a and b) SnO<sub>2</sub>.

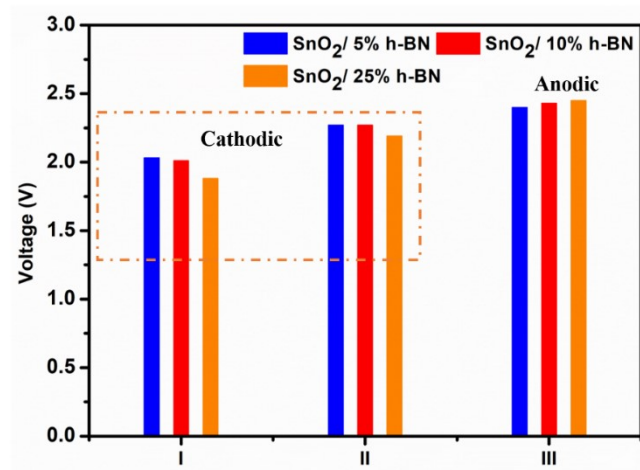

**Figure S6.** Peak voltages (cathode peaks: I and II, anodic peaks III) of SnO<sub>2</sub>/5% h-BN composite coated separated cell (blue color), SnO<sub>2</sub>/10% h-BN composite coated separated cell (red color) and SnO<sub>2</sub>/25% h-BN composite coated separated cell (orange color).

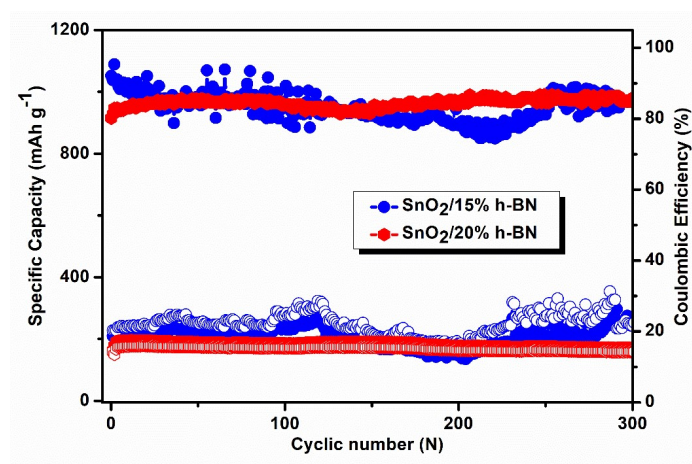

**Figure S7.** Cycling performance of lithium sulfur batteries fabricated with SnO<sub>2</sub>/15% h-BN composite coated separator, and SnO<sub>2</sub>/20% h-BN composite coated separator at a current rate of 1.0 C.

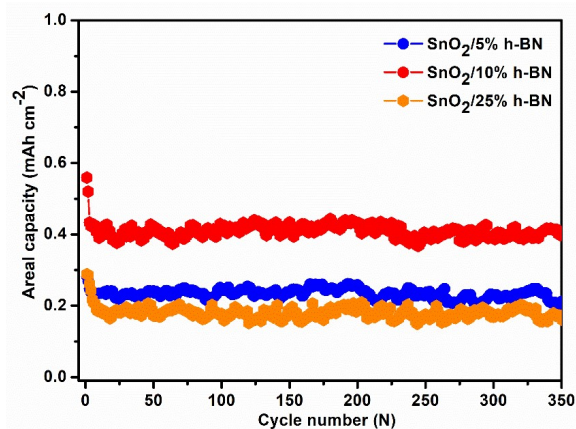

**Figure S8.** Areal capacity of lithium sulfur batteries fabricated with the SnO<sub>2</sub>/5% h-BN composite coated separator, SnO<sub>2</sub>/10% h-BN composite coated separator, and SnO<sub>2</sub>/25% h-BN composite coated separator.

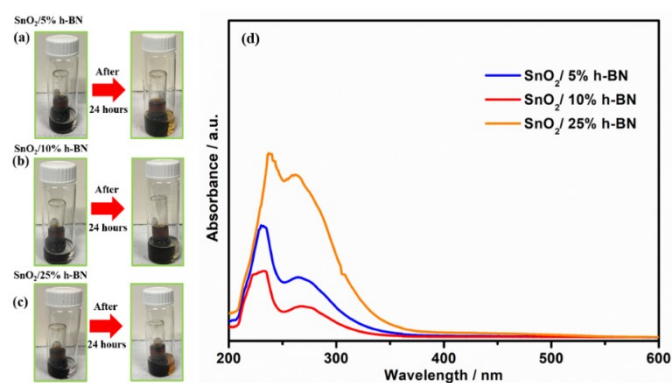

**Figure S9.** Digital photograph of polysulfide adsorption study using (a) SnO<sub>2</sub>/5% h-BN coated separator, (b) SnO<sub>2</sub>/10% h-BN coated separator and (c) SnO<sub>2</sub>/25% h-BN coated separator before and after 24 hours; (d) UV–Vis spectra of SnO<sub>2</sub>/5% h-BN coated separator, SnO<sub>2</sub>/10% h-BN coated separator and SnO<sub>2</sub>/25% h-BN coated separator after 24 hours.
